# Supplementary material for: Mapping Influenza-Induced Posttranslational Modifications on Histones from CD8+ T Cells
Source: Preprints.org preprint supplement (doi:10.20944/preprints202010.0215.v1), 2020-10-12
Supplement: Supplementary file 1 [file supplementary]

## Sheet: A
Family	Subtype	Accession Number	Observed Mass (Da)	Fragments	Post Translational Modifications	p Value
H2A	H2A1	P22752	14041	16	none	4.6e-25
H2A	H2A1	P22752	14022.9	17	R3me2	1.1e-14
H2A	H2A1	P22752	14079.1	29	S1acK5ac	6.2e-38
H2A	H2A1	Q6GSS7	13996.6	31	S1ac	2.11e-59
H2A	H2A1	P22752	14117	39	S1pK5ac	3.4e-54
H2A	H2A1	P22752	14037.9	41	S1ac	9.16e-73
H2A	H2A1	P22752	14037	47	S1ac	1.1e-102
H2A	H2A1F	Q8CGP5	14063	30	S1ac	4.3e-61
H2A	H2A1H	Q8CGP6	13837.9	8	R3me2	9.3e-10
H2A	H2A2A	Q6GSS7	14035.9	7	S1p	8.37e-12
H2A	H2A2A	Q6GSS7	14062.9	8	S1pR3me2	7.9e-07
H2A	H2A2A	Q6GSS7	14078.1	9	S1pK5ac	3.9e-06
H2A	H2A2A	Q6GSS7	14036	10	S1p	1.1e-10
H2A	H2A2A	Q6GSS7	14078.1	13	S1acT120p	1e-14
H2A	H2A2A	Q6GSS7	13996.9	61	S1ac	8e-93
H2A	H2A2B	Q64522	13914.9	9	S1ac	2.2e-22
H2A	H2A2B	Q64522	13995.8	18	S1acT120p	1.67e-35
H2A	H2A2B	Q64522	13994.9	29	S1acT120p	9.1e-36
H2A	H2A3	Q8BFU2	14009.9	7	R3me2	8.69e-14
H2A	H2A3	Q8BFU2	14062.1	21	S1p	1.8e-19
H2A	H2A3	Q8BFU2	14140	24	R4me2	6.7e-31
H2A	H2A3	Q8BFU2	14023.1	29	S1ac	6.3e-62
H2A	H2AC12	A3KPD0	13853	59	S1ac	2.1e-91
H2A	H2AC15	Q0VE75	14052	33	S1ac	1.5e-67
H2A	H2AC20	Q149V4	13889.9	45	S1ac	5.7e-61
H2A	H2AJ	Q8R1M2	13948.9	59	S1ac	6.9e-89
H2A	H2AV	Q3THW5	13368.7	16	none	2.9e-26
H2A	H2AX	P27661	15043.5	47	S1ac	1.4e-66
H2A	H2AZ	P0C0S6	13414.6	12	none	1.1e-16
H2A	H2AZ	P0C0S6	13412.6	58	none	3.3e-90
H2B	H2B1A	P70696	14564.7	23	M1acK7acK13acK14acK17acK18acK22acK25ac	1.8e-37
H2B	H2B1B	Q64475	13812.5	14	none	2.34e-28
H2B	H2B1B	Q64475	13812.6	30	none	6.9e-53
H2B	H2B1C	Q6ZWY9	13766.5	22	none	4.93e-47
H2B	H2B1C	Q6ZWY9	13808.6	34	K23ac	8.6e-61
H2B	H2B1C	Q6ZWY9	13765.6	59	none	1.1e-86
H2B	H2B1F	P10853	13796.5	22	none	4.93e-47
H2B	H2B1F	P10853	13837.6	25	K108ac	4.1e-25
H2B	H2B1F	P10853	13795.6	54	none	4.8e-92
H2B	H2B1H	Q64478	13809.5	9	none	2.7e-10
H2B	H2B1H	Q64478	13781.4	10	none	2.2e-21
H2B	H2B1H	Q64478	13780.6	47	none	1.2e-65
H2B	H2B1K	Q8CGP1	13779.6	17	none	8.1e-34
H2B	H2B1M	P10854	13795.6	24	none	5.2e-26
H2B	H2B2B	Q64525	13780.6	16	none	1.8e-16
H2B	H2B3B	Q8CGP0	13889.9	6	S14pK108ac	0.00025
H2B	H2B3B	Q8CGP0	13811.5	12	P1ac	7e-11
H2B	H2B3B	Q8CGP0	13768.6	19	none	4.3e-23
H3	H31	P68433	15440.6	12	T3pK23acK27me2K36me2	7.9e-12
H3	H31	P68433	15406.7	12	K9me3K23meK27me3K36me3	2.4e-14
H3	H31	P68433	15375.6	15	K18acK23meK27me3K36me	6.1e-29
H3	H31	P68433	15388.6	19	K23acK27acK36ac	1.4e-18
H3	H31	P68433	15419.6	19	K9me2K23acK27me3K36me3	2.6e-24
H3	H32	P84228	15456.8	14	R8me2K9meK18acK23acK27acK36ac	1.1e-15
H3	H32	P84228	15414.5	14	K9me2K18meK23acK27acK36ac	1.7e-24
H3	H32	P84228	15345.6	15	K18acK23meK27me3	4.5e-29
H3	H32	P84228	15442.6	18	K9me2K18acK23acK27acK36ac	4.8e-23
H3	H32	P84228	15331.7	21	K9me3K27meK36me2	2.2e-20
H3	H32	P84228	15345.5	22	K9meK18meK27me2K36ac	1.1e-21
H3	H32	P84228	15302.6	26	K9me2K27me2	9.9e-35
H3	H33	P84244	15469.6	11	K4acR8me2K9acK18acK23acK27me3K36me3	4e-13
H3	H33	P84244	15398.6	11	K9me3K18acK23acK27acK36ac	9.6e-22
H3	H33	P84244	15302.5	11	K9me2K27me3K36me3	1.4e-24
H3	H33	P84244	15396.6	15	R8me2K9meK18acK23acK27acK36ac	1.9e-32
H3	H33	P84244	15382.7	17	K9me2K18acK23acK27acK36ac	1.3e-36
H3	H33	P84244	15385.6	19	K9me2K18acK23acK27me3K36me3	1.6e-22
H4	H4	P62806	11368.5	8	R3me2K5acK8acK20me2	1.1e-07
H4	H4	P62806	11399.4	8	S1acK12acK16acK20me3	2e-16
H4	H4	P62806	11328.4	9	R3me2K16acK20me2	2.6e-07
H4	H4	P62806	11284.4	9	S1acK20me	3.13e-19
H4	H4	P62806	11356.4	11	K12acK16acK20me3	2.9e-12
H4	H4	P62806	11355.5	13	S1acK12acK16ac	5.4e-11
H4	H4	P62806	11342.5	13	S1acR3me2K20me3	9.5e-12
H4	H4	P62806	11356.5	13	S1acK16acK20me3	1.31e-14
H4	H4	P62806	11356.5	13	S1ac	1.3e-19
H4	H4	P62806	11399.5	14	S1acK20me3	8.5e-22
H4	H4	P62806	11341.6	15	K12acK16acK20me2	9.3e-18
H4	H4	P62806	11313.5	17	S1acR3meK20me2	2.2e-16
H4	H4	P62806	11313.5	17	S1acK16ac	2.3e-28
H4	H4	P62806	11356.5	20	S1acK16acK20me3	8.7e-33
H4	H4	P62806	11298.5	21	K5acK20me2	5.7e-23
H4	H4	P62806	11383.5	21	S1acK12acK16acK20me2	8.6e-34
H4	H4	P62806	11315.3	30	S1acK20me3	3.55e-32
H4	H4	P62806	11326.6	31	S1acK16acK20me	1.7e-41
H4	H4	P62806	11300.6	32	R3me2K20me3	3e-39
H4	H4	P62806	11313.6	35	S1acK20me3	1.6e-43
H4	H4	P62806	11284.4	37	S1acK20me	1.4e-47
H4	H4	P62806	11298.5	50	S1acK20me2	3.5e-61
H4	H4	P62806	11340.5	50	S1acK16acK20me2	2.83e-70
H4	H4	P62806	11340.6	55	S1acK16acK20me2	1.1e-73
H4	H4	P62806	11298.6	56	S1acK20me2	2.6e-77

## Sheet: B
Family	Subtype	Accession Number	Observed Mass (Da)	Fragments	Post Translational Modifications	p Value
H1F	H1F2	Q5SZA3	21164.9	21	S1ac	8.8e-36
H2A	H2A1	P22752	14036.9	1	S1ac	1.3e-54
H2A	H2A1	P22752	14038	1	K5ac	1.02e-30
H2A	H2A1	P22752	14079	2	S1acK5ac	2.39e-05
H2A	H2A1	P22752	14118.1	9	S1pK5ac	5.9e-09
H2A	H2A1	P22752	14118.1	9	S1acT120p	2.8e-19
H2A	H2A1	P22752	13995	16	none	1e-11
H2A	H2A1	P22752	14080.1	25	S1acK5ac	2.6e-36
H2A	H2A1	P22752	14038.1	45	S1ac	2.5e-84
H2A	H2A1F	Q8CGP5	14061.9	1	S1ac	3.21e-17
H2A	H2A1F	Q8CGP5	14063	1	K5ac	7.13e-18
H2A	H2A1F	Q8CGP5	14050.1	10	R3me2	1.9e-08
H2A	H2A1F	Q8CGP5	14063	32	S1ac	4.2e-45
H2A	H2A1H	Q8CGP6	13851.9	1	K5ac	4.99e-44
H2A	H2A1K	Q8CGP7	14053.9	1	K5ac	3.96e-21
H2A	H2A2A	Q6GSS7	13996.9	1	K5ac	5.81e-22
H2A	H2A2A	Q6GSS7	13997.9	1	S1ac	2.29e-52
H2A	H2A2A	Q6GSS7	14039.1	8	S1acK5ac	6.1e-07
H2A	H2A2A	Q6GSS7	14077.9	9	S1pK5ac	1.8e-05
H2A	H2A2A	Q6GSS7	14034.9	10	S1p	4.6e-06
H2A	H2A2A	Q6GSS7	14064	10	S1pR3me2	5.2e-15
H2A	H2A2A	Q6GSS7	14118.9	11	S1acK5acT120p	3.9e-14
H2A	H2A2A	Q6GSS7	14077.9	12	S1acT120p	1.9e-11
H2A	H2A2A	Q6GSS7	13997.1	52	S1ac	5.6e-79
H2A	H2A2B	Q64522	13997.9	2	S1acT120p	1.72e-12
H2A	H2A2B	Q64522	13994.9	31	S1acT120p	3.1e-37
H2A	H2A3	Q8BFU2	14023	1	S1ac	3.13e-31
H2A	H2A3	Q8BFU2	14023	1	K5ac	3.3e-05
H2A	H2A3	Q8BFU2	14023	18	S1ac	1e-16
H2A	H2A3	Q8BFU2	14065.1	18	S1acK5ac	6.8e-25
H2A	H2A3	Q8BFU2	14061	21	S1p	2.8e-24
H2A	H2AC12	A3KPD0	13851.9	1	S1ac	6.45e-22
H2A	H2AC12	A3KPD0	13852	52	S1ac	5.4e-81
H2A	H2AC15	Q0VE75	14051	37	S1ac	4e-52
H2A	H2AC20	Q149V4	13890.8	45	S1ac	1.6e-63
H2A	H2AJ	Q8R1M2	13947	36	S1ac	2.1e-72
H2A	H2AX	P27661	15043.5	1	S1ac	5.19e-46
H2A	H2AX	P27661	15044.5	54	S1ac	2.5e-76
H2A	H2AZ	P0C0S6	13412.5	49	none	5.6e-89
H2B	H2B1A	P70696	14564.7	18	M1acK7acK13acK14acK17acK18acK22acK25ac	1.2e-16
H2B	H2B1B	Q64475	13811.6	37	none	2.2e-48
H2B	H2B1C	Q6ZWY9	13808.6	17	P1ac	1.7e-14
H2B	H2B1C	Q6ZWY9	13845.6	24	S14p	6.5e-46
H2B	H2B1C	Q6ZWY9	13765.6	53	none	2.8e-68
H2B	H2B1F	P10853	13838.7	21	K23ac	6.4e-44
H2B	H2B1F	P10853	13795.7	51	none	5.8e-93
H2B	H2B1H	Q64478	13808.6	23	none	5.7e-20
H2B	H2B1H	Q64478	13779.6	40	none	3.1e-46
H2B	H2B1K	Q8CGP1	13779.6	28	none	2.1e-32
H2B	H2B1M	P10854	13795.6	22	none	1.7e-21
H2B	H2B2B	Q64525	13779.6	22	none	3.9e-24
H3	H31	P68433	15349.6	11	K27me3K36me3	4.2e-29
H3	H31	P68433	15377.6	13	K18meK23meK27me3K36me3	2.4e-26
H3	H31	P68433	15407.6	13	K9me3K23meK27me3K36me3	6.9e-28
H3	H31	P68433	15430.6	15	K9me2K18meK23acK27acK36ac	2.5e-21
H3	H31	P68433	15393.5	18	K9me3K27me3K36me3	1.2e-20
H3	H31	P68433	15347.6	20	K18acK27me2K36me	3.9e-43
H3	H32	P84228	15442.7	8	K9me2K18acK23acK27acK36ac	2.5e-17
H3	H32	P84228	15414.6	14	K9me2K18meK23acK27acK36ac	2.3e-28
H3	H32	P84228	15414.6	14	K18acK23acK27acK36ac	2.1e-29
H3	H33	P84244	15386.4	13	K9me2K18acK23acK27me3K36me3	2.4e-18
H4	H4	P62806	11340.5	11	S1acK16acK20me2	4.7e-15
H4	H4	P62806	11314.5	12	K5acK20me3	2.7e-10
H4	H4	P62806	11383.5	13	S1acK12acK16acK20me2	1e-21
H4	H4	P62806	11399.6	13	S1acK20me3	6.3e-14
H4	H4	P62806	11356.5	17	S1ac	3.5e-15
H4	H4	P62806	11356.4	18	S1acK16acK20me3	9.1e-21
H4	H4	P62806	11300.6	19	R3me2K20me3	9.9e-19
H4	H4	P62806	11314.4	19	S1acK20me3	1.6e-18
H4	H4	P62806	11343.4	21	R3me2K16acK20me3	1.7e-21
H4	H4	P62806	11342.3	25	R3me2K12acK20me3	8.8e-27
H4	H4	P62806	11286.5	28	R3meK20me3	9.5e-37
H4	H4	P62806	11284.5	31	S1acK20me	1.3e-37
H4	H4	P62806	11299.4	52	S1acK20me2	8.4e-74

## Sheet: C
Family	Subtype	Accession Number	Observed Mass (Da)	Fragments	Post Translational Modifications	p Value
H2A	A3KPD0	A3KPD0	13852.9	1	S1ac	2.23e-38
H2A	H2A1	P22752	14038	1	K5ac	4.19e-17
H2A	H2A3	Q8BFU2	14012.9	1	R3me2	1.07e-06
H2A	H2az1	P0C0S6	13413.6	51	none	5.69e-60
H2A	H2A1	P22752	13995	53	none	8.77e-74
H2A	H2A1	P22752	14037	45	S1ac	3.37e-86
H2A	H2A1	P22752	14037.9	8	S1ac	1.92e-12
H2A	H2A1	P22752	14038	1	S1ac	1.76e-53
H2A	H2A1	P22752	14038	1	K5ac	1.34e-28
H2A	H2A1	P22752	14041.9	6	none	1.57e-12
H2A	H2AX	P27661	15044.5	24	S1ac	2.12e-44
H2A	H2AX	P27661	15045.4	1	S1ac	7.33e-19
H2A	H2AC15	Q0VE75	14051	1	S1ac	9.07e-08
H2A	H2AC15	Q0VE75	14051.9	14	S1ac	2.61e-28
H2A	H2AC20	Q149V4	13889.8	1	S1ac	7.2e-19
H2A	H2AC20	Q149V4	13890.8	24	S1ac	2.99e-36
H2A	H2AC20	Q149V4	13890.8	35	S1ac	3.83e-73
H2A	H2A2B	Q64522	13997.9	1	S1acT120p	5.15e-20
H2A	H2A2C	Q64523	13933	50	S1acK5ac	4.45e-87
H2A	H2A2A	Q6GSS7	13996.9	25	S1ac	1.76e-53
H2A	H2A2A	Q6GSS7	13997	1	K5ac	1.07e-11
H2A	H2A2A	Q6GSS7	13998	1	S1ac	5.4e-56
H2A	H2A2A	Q6GSS7	13998	49	S1ac	1.06e-89
H2A	H2A2A	Q6GSS7	14036	6	S1p	8.65e-15
H2A	H2A2A	Q6GSS7	14039.1	13	S1ac	2.5e-17
H2A	H2A2A	Q6GSS7	14062.8	9	S1pR3me2	9.3e-16
H2A	H2A3	Q8BFU2	13981	35	none	9.83e-46
H2A	H2A3	Q8BFU2	14023	34	S1ac	9.03e-50
H2A	H2A3	Q8BFU2	14025	1	S1ac	3.33e-21
H2A	H2A3	Q8BFU2	14062	20	S1p	3.76e-37
H2A	H2A3	Q8BFU2	14065.7	9	S1acK5ac	1.42e-07
H2A	H2A1F	Q8CGP5	14021.9	10	none	4.63e-14
H2A	H2A1F	Q8CGP5	14062.9	17	S1ac	6.45e-29
H2A	H2A1F	Q8CGP5	14063	1	K5ac	5.61e-16
H2A	H2A1F	Q8CGP5	14064	1	S1ac	7.38e-12
H2A	H2A1H	Q8CGP6	13851.8	1	K5ac	1.02e-28
H2A	H2A1K	Q8CGP7	14050	1	K5ac	4.05e-17
H2A	H2AJ	Q8R1M2	13948	1	S1ac	6.23e-26
H2A	H2AJ	Q8R1M2	13948	7	S1ac	3.7e-17
H2B	H2B1F	P10853	13795.6	57	none	5.39e-81
H2B	H2B1F	P10853	13796.5	34	none	1.73e-69
H2B	H2B1F	P10853	13880.4	16	K20acK23ac	5.93e-21
H2B	H2B1A	P70696	14563.1	24	M1acK7acK13acK14acK17acK18acK22acK25ac	1.06e-38
H2B	H2B1B	Q64475	13812.5	52	none	1.73e-65
H2B	H2B1B	Q64475	13812.6	27	none	3.44e-44
H2B	H2B1H	Q644778	13780.5	9	none	1.21e-22
H2B	H2B1H	Q644778	13860.5	13	S14p	5.89e-21
H2B	H2bc9	Q64478	13781.5	26	none	2.32e-50
H2B	H2B1C	Q6ZWY9	13766.5	44	none	7.17e-65
H2B	H2B1C	Q6ZWY9	13766.5	8	none	1.43e-16
H2B	H2B1C	Q6ZWY9	13845.6	22	S14p	5.45e-25
H2B	H2B1C	Q6ZWY9	13850.5	9	K20acK23ac	5.94e-13
H2B	H2B1C	Q6ZWY9	13851.4	6	K20acK23ac	1.66e-09
H2B	H2B1C	Q6ZWY9	13898.5	6	none	5.99e-09
H2B	H2A1P	Q8CGP2	13852.6	23	none	6.46e-24
H2B	H2A1P	Q8CGP2	14441.4	15	M1acK6acK12acK13acS15pK16acK17acK21acK24acK109ac	5.32e-13
H3	H3C1	P68433	15377.6	7	K9me2K27me3K36me3	5.63e-18
H3	H3C1	P68433	15421.6	10	K9me3K18meK23meK27me3K36me3	3.65e-09
H3	H3C1	P68433	15477.5	9	K9me3K18acK23acK27me3K36me3	1.77e-09
H3	H3a	P84244	15383.5	15	K9me2K18acK23acK27acK36ac	8.04e-15
H3	H3a	P84244	15397.6	10	R8me2K9meK18acK23acK27acK36ac	4.65e-12
H3	H3a	P84244	15397.6	11	K9me3K18acK23acK27acK36ac	1.67e-12
H4	H4	P62806	11257.5	60	K20me2	7.33e-84
H4	H4	P62806	11270.5	13	K16ac	1.29e-13
H4	H4	P62806	11271.5	37	K20me3	9.29e-47
H4	H4	P62806	11285.5	34	S1acK20me	3.8e-49
H4	H4	P62806	11285.5	30	S1acK20me	1.89e-30
H4	H4	P62806	11298.5	60	S1acK20me2	2.65e-73
H4	H4	P62806	11299.5	56	S1acK20me2	2.73e-79
H4	H4	P62806	11300.4	23	R3me2K20me3	2.33e-31
H4	H4	P62806	11312.5	14	S1acR3meK20me2	5.21e-14
H4	H4	P62806	11313.5	12	S1acK16ac	2.33e-12
H4	H4	P62806	11314.4	40	S1acK20me3	1.25e-52
H4	H4	P62806	11315.4	21	S1acK20me3	1.93e-29
H4	H4	P62806	11327.5	36	S1acK16acK20me	1.34e-52
H4	H4	P62806	11341.4	61	S1acK16acK20me2	9.05e-79
H4	H4	P62806	11341.5	59	S1acK16acK20me2	2.03e-77
H4	H4	P62806	11356.4	18	S1acK16acK20me3	8.57e-22
H4	H4	P62806	11356.4	17	S1acK16acK20me3	5.86e-16
H4	H4	P62806	11382.5	18	S1acK12acK16acK20me2	2.04e-36
H4	H4	P62806	11382.5	60	S1acK12acK16acK20me2	1.53e-66
H4	H4	P62806	11394.4	19	S1acK20me3Y88p	1.82e-23
H4	H4	P62806	11411.4	27	S1acK5acK12acK16acK20me	1.87e-33
H4	H4	P62806	11411.4	23	S1acK5acK8acK16acK20me	8.4e-33
H4	H4	P62806	11425.4	56	S1acK8acK12acK16acK20me2	3.08e-81
H4	H4	P62806	11436.6	9	S1acK16acK20me3S47p	1.74e-06
H4	H4	P62806	11438.4	19	S1acK5acK8acK12acK16ac	5.84e-35
H4	H4	P62806	11467.3	13	S1acK5acK8acK12acK16acK20me2	4.87e-21

## Sheet: D
Core	Subtype	Accession Number	Observed Mass (Da)	Fragments	Post Translational Modifications	p Value
H2A	H2A1	P22752	14038	1	S1ac	1.64e-38
H2A	H2A1	P22752	14038	1	K5ac	4.19e-17
H2A	H2A1	P22752	14079	2	S1acK5ac	2.12e-18
H2A	H2A1	P22752	14042.7	13	none	1.61e-20
H2A	H2A1	P22752	13996.8	14	none	1.38e-12
H2A	H2A1	P22752	13996.8	19	none	9.96e-23
H2A	H2A1	P22752	14041.9	20	none	6.78e-33
H2A	H2A1	P22752	14037.9	26	S1ac	1.89e-50
H2A	H2A1	P22752	14037.7	59	S1ac	1.09e-111
H2A	H2A1F	Q8CGP5	14063	1	S1ac	1e-13
H2A	H2A1F	Q8CGP5	14063	1	K5ac	2.08e-13
H2A	H2A1F	Q8CGP5	14050.8	6	R3me2	9.42e-08
H2A	H2A1F	Q8CGP5	14050.8	6	R3me2	3.91e-07
H2A	H2A1F	Q8CGP5	14134.7	6	S1acR3me2K5ac	1.46e-06
H2A	H2A1F	Q8CGP5	14022.8	7	none	1.61e-07
H2A	H2A1F	Q8CGP5	14021.8	8	none	1.57e-08
H2A	H2A1F	Q8CGP5	14143.7	25	S1acT120p	1.65e-37
H2A	H2A1F	Q8CGP5	14064.8	36	S1ac	1e-67
H2A	H2A1F	Q8CGP5	14063.7	43	S1ac	2.11e-55
H2A	H2A1H	Q8CGP6	13852.9	1	K5ac	3.63e-20
H2A	H2A1K	Q8CGP7	14051	1	K5ac	2.72e-18
H2A	H2A2A	Q6GSS7	13998	1	S1ac	7.41e-38
H2A	H2A2A	Q6GSS7	13998	1	K5ac	3.27e-13
H2A	H2A2A	Q6GSS7	14036.7	10	S1p	5.76e-18
H2A	H2A2A	Q6GSS7	14062.8	14	S1pR3me2	5.33e-21
H2A	H2A2A	Q6GSS7	14078.8	16	S1acT120p	6.62e-23
H2A	H2A2A	Q6GSS7	14040.8	17	S1acK5ac	9.46e-28
H2A	H2A2A	Q6GSS7	14036.8	18	S1p	2.5e-30
H2A	H2A2A	Q6GSS7	14039.8	23	S1acK5ac	1.54e-31
H2A	H2A2A	Q6GSS7	13997.7	47	S1ac	5.73e-96
H2A	H2A2A	Q6GSS7	13997.9	64	S1ac	6.47e-101
H2A	H2A2B	Q64522	13997.9	2	S1acT120p	3.08e-05
H2A	H2A2B	Q64522	13996.7	20	S1acT120p	3.26e-46
H2A	H2A2B	Q64522	13996.7	35	S1acT120p	6.81e-65
H2A	H2A3	Q8BFU2	14023.9	1	S1ac	8.73e-10
H2A	H2A3	Q8BFU2	14012.9	1	R3me2	1.07e-06
H2A	H2A3	Q8BFU2	14093.7	15	S1acR3me2K5ac	6.37e-26
H2A	H2A3	Q8BFU2	14023.9	15	S1ac	3.51e-23
H2A	H2A3	Q8BFU2	13981.6	18	none	2.83e-26
H2A	H2A3	Q8BFU2	14061.9	19	S1p	3.25e-33
H2A	H2A3	Q8BFU2	14141.7	20	R4me2	4.61e-30
H2A	H2A3	Q8BFU2	14066.8	25	S1acK5ac	7.21e-38
H2A	H2A3	Q8BFU2	14062.7	28	S1p	3.65e-44
H2A	H2A3	Q8BFU2	14090.7	28	S1pR3me2	2.05e-43
H2A	H2A3	Q8BFU2	14065.7	28	S1acK5ac	3.44e-39
H2A	H2A3	Q8BFU2	14090.8	32	S1pR3me2	1.37e-41
H2A	H2A3	Q8BFU2	14023.7	41	S1ac	7.93e-69
H2A	H2AC12	A3KPD0	13853.8	25	S1ac	3.26e-52
H2A	H2AC13	A3KPD1	13852.9	1	S1ac	2.23e-38
H2A	H2AC15	Q0VE75	14052	1	S1ac	8.77e-17
H2A	H2AC15	Q0VE75	14051.9	36	S1ac	5.64e-55
H2A	H2AC15	Q0VE75	14052.7	44	S1ac	6.4e-71
H2A	H2AC20	Q149V4	13889.9	1	S1ac	5.43e-11
H2A	H2AC20	Q149V4	13890.7	21	S1ac	9.25e-31
H2A	H2AC20	Q149V4	13890.7	64	S1ac	6.2e-103
H2A	H2AJ	Q8R1M2	13948	1	S1ac	5.97e-42
H2A	H2AJ	Q8R1M2	13947.8	64	S1ac	8.33e-92
H2A	H2AJ	Q8R1M2	13948.9	65	S1ac	1.47e-97
H2A	H2AV	Q3THW5	13412.3	12	K13ac	1.1e-10
H2A	H2AX	P27661	15044.5	1	S1ac	1.22e-45
H2A	H2AX	P27661	15044.3	40	S1ac	2.1e-74
H2A	H2AX	P27661	15044.4	50	S1ac	1.1e-68
H2A	H2AZ	P0C0S6	13413.4	59	none	4.1e-95
H2B	H2B1A	P70696	14474.1	15	P1acK6acK12acK13acK16acK17acK21acK24acK109ac	1.53e-20
H2B	H2B1A	P70696	14563.5	22	M1acK7acK13acK14acK17acK18acK22acK25ac	1.65e-38
H2B	H2B1A	P70696	14521.2	23	M1acK7acK13acK14acK17acK18acK22ac	6.75e-45
H2B	H2B1A	P70696	14564.4	34	M1acK7acK13acK14acK17acK18acK22acK25ac	2.59e-52
H2B	H2B1B	Q64475	13896.4	24	K20acK23ac	6.36e-44
H2B	H2B1B	Q64475	13896.2	35	K20acK23ac	3.7e-53
H2B	H2B1B	Q64475	13812.4	43	none	1.71e-69
H2B	H2B1B	Q64475	13812.4	48	none	1.65e-85
H2B	H2B1C	Q6ZWY9	13898.3	15	none	7.35e-22
H2B	H2B1C	Q6ZWY9	13766.3	16	none	1.78e-37
H2B	H2B1C	Q6ZWY9	13898.5	26	none	2.6e-44
H2B	H2B1C	Q6ZWY9	13847.4	30	S14p	4.09e-53
H2B	H2B1C	Q6ZWY9	13809.4	36	K108ac	5.25e-66
H2B	H2B1C	Q6ZWY9	13850.4	40	K20acK23ac	5.34e-67
H2B	H2B1C	Q6ZWY9	13809.5	41	K23ac	1.78e-74
H2B	H2B1C	Q6ZWY9	13846.2	43	S14p	4.5e-64
H2B	H2B1C	Q6ZWY9	13850.3	44	K20acK23ac	6.72e-79
H2B	H2B1C	Q6ZWY9	13809.5	46	K23ac	1.69e-82
H2B	H2B1C	Q6ZWY9	13808.4	47	K108ac	2.36e-73
H2B	H2B1C	Q6ZWY9	13766.4	70	none	3.93e-121
H2B	H2B1F	P10853	13928.3	22	none	2.15e-35
H2B	H2B1F	P10853	13877.3	23	S14p	5.91e-42
H2B	H2B1F	P10853	13838.3	32	K23ac	1.8e-62
H2B	H2B1F	P10853	13880.2	41	K20acK23ac	5.66e-77
H2B	H2B1F	P10853	13880.3	45	K20acK23ac	1.55e-69
H2B	H2B1F	P10853	13839.3	53	K23ac	6.9e-77
H2B	H2B1F	P10853	13797.3	69	none	1.21e-123
H2B	H2B1F	P10853	13796.3	70	none	1.02e-119
H2B	H2B1H	Q64478	13851.3	35	K23ac	4.04e-40
H2B	H2B1H	Q64478	13865.3	37	K20acK23ac	2.27e-66
H2B	H2B1H	Q64478	13865.4	44	K20acK23ac	1.66e-67
H2B	H2B1H	Q64478	13808.2	45	none	1.82e-66
H2B	H2B1H	Q64478	13809.3	48	none	7.78e-77
H2B	H2B1H	Q64478	13780.4	49	none	1.43e-78
H2B	H2B1H	Q64478	13780.3	52	none	1.81e-82
H2B	H2B1K	Q8CGP1	13780.4	26	none	2.75e-46
H2B	H2B1K	Q8CGP1	13780.5	35	none	2.47e-41
H2B	H2B1P	Q8CGP2	14427.1	16	M1acK12acK13acS15pK16acK17acK21acK24acK109ac	9.82e-21
H2B	H2B1P	Q8CGP2	14386.3	28	M1acK12acK13acS15pK16acK17acK21acK24ac	2.2e-43
H2B	H2B1P	Q8CGP2	13852.3	31	none	3.53e-55
H2B	H2B1P	Q8CGP2	13852.4	33	none	1.35e-51
H2B	H2B2B	Q64525	13780.4	9	none	7.38e-20
H2B	H2B2B	Q64525	13912.4	25	none	6.22e-42
H2B	H2B2B	Q64525	14408.3	27	M1acK6acK12acK13acS15pK16acK17acK21acK24acY43p	5.17e-42
H2B	H2B2B	Q64525	14408.3	32	M1acK6acK12acK13acS15pK16acK17acK21acK24acY43p	9.45e-48
H2B	H2B2B	Q64525	13780.4	36	none	1.14e-65
H2B	H2B3B	Q8CGP0	13769.4	10	none	7.06e-20
H2B	H2B3B	Q8CGP0	13848.4	15	S14p	3.8e-29
H2B	H2B3B	Q8CGP0	13849.3	24	S14p	3.98e-45
H2B	H2B3B	Q8CGP0	13811.4	24	K23ac	9.72e-39
H2B	H2B3B	Q8CGP0	13768.5	26	none	1.12e-41
H2B	H2B3B	Q8CGP0	13811.4	28	K23ac	5.83e-37
H3	H31	P68433	15364.4	16	K18meK27me3K36me3	1.9e-21
H3	H31	P68433	15350.4	18	K27me3K36me3	4.2e-38
H3	H31	P68433	15335.3	19	K27me3K36me2	1.89e-43
H3	H31	P68433	15334.3	19	K23meK27me3K36me	7.42e-35
H3	H31	P68433	15349.4	22	K9me2K18meK36me3	4.05e-45
H3	H31	P68433	15389.4	22	K18acK23meK27me2K36ac	9.86e-41
H3	H31	P68433	15321.4	22	K23meK27me3	7.46e-39
H3	H31	P68433	15333.5	23	K9me2K36ac	3.47e-39
H3	H31	P68433	15347.4	24	K27acK36ac	5.19e-50
H3	H31	P68433	15349.4	24	K23meK27me3K36me2	4.83e-46
H3	H31	P68433	15374.5	24	K9me2K18acK36ac	2.6e-45
H3	H31	P68433	15364.5	24	K9me3K27meK36me3	4.43e-38
H3	H31	P68433	15350.5	25	K27me3K36me3	1.49e-55
H3	H31	P68433	15319.6	25	K27me2K36me2	1.81e-52
H3	H31	P68433	15335.3	25	K9me2K27me3	4.65e-43
H3	H31	P68433	15320.3	25	K9me2K36me2	4.96e-43
H3	H31	P68433	15305.4	25	K9me2K36me	4.11e-41
H3	H31	P68433	15388.5	25	K18acK27acK36ac	1.18e-39
H3	H31	P68433	15321.3	26	K27me3K36me	7.26e-50
H3	H31	P68433	15320.4	26	K9me2K27me2	6.13e-45
H3	H31	P68433	15349.4	26	K9me2K23meK36me3	2.55e-43
H3	H31	P68433	15364.4	26	K9me3K27meK36me3	2.76e-42
H3	H31	P68433	15361.4	27	K9me2K27me2K36ac	1.33e-53
H3	H31	P68433	15335.4	27	K9me2K36me3	3.38e-51
H3	H31	P68433	15363.5	27	K9me2K27me2K36me3	2.04e-44
H3	H31	P68433	15360.5	27	K18acK27acK36me	2.22e-43
H3	H31	P68433	15348.4	28	K27me3K36ac	6.32e-56
H3	H31	P68433	15364.5	28	K23meK27me3K36me3	1.31e-52
H3	H31	P68433	15332.5	28	K9me2K36ac	3.31e-51
H3	H31	P68433	15403.5	28	K18acK23meK27acK36ac	4.5e-50
H3	H31	P68433	15333.4	28	K9me2K27meK36me2	1.4e-49
H3	H31	P68433	15334.3	28	K27acK36me2	7.46e-45
H3	H31	P68433	15332.5	28	K9me2K27ac	1.67e-42
H3	H31	P68433	15318.5	29	K9me2K23meK27me	2.26e-55
H3	H31	P68433	15334.4	29	K27me3K36me2	7.88e-54
H3	H31	P68433	15305.5	29	K9me2K18me	5.83e-53
H3	H31	P68433	15378.4	29	K9me2K27me3K36me3	1.34e-51
H3	H31	P68433	15319.4	30	K9me2K27me2	6.05e-59
H3	H31	P68433	15333.4	30	K9meK18meK27me2K36me	1.25e-56
H3	H31	P68433	15375.4	30	K18acK23acK27meK36me	1.05e-49
H3	H31	P68433	15361.4	30	K9meK18meK27me2K36ac	3.13e-49
H3	H31	P68433	15363.4	30	K9meK18meK27me2K36me3	9.77e-49
H3	H31	P68433	15349.3	30	K9me2K27meK36me3	3.03e-43
H3	H31	P68433	15361.4	31	K9me2K23meK27meK36ac	2.7e-59
H3	H31	P68433	15334.4	31	K9meK18meK23meK27meK36me	1.47e-57
H3	H31	P68433	15349.4	31	K9me2K27me3K36me	2.33e-48
H3	H31	P68433	15361.5	31	K9me2K18meK27meK36ac	9.18e-36
H3	H31	P68433	15321.4	32	K27me3K36me	5.11e-61
H3	H31	P68433	15318.5	32	K27acK36me	4.7e-57
H3	H31	P68433	15348.4	32	K9meK18meK27me2K36me2	5.37e-53
H3	H31	P68433	15348.4	32	K9me2K18meK27meK36me2	5.55e-37
H3	H31	P68433	15348.5	33	K9me2K27me2K36me2	1.79e-56
H3	H31	P68433	15334.4	33	K9me2K27me2K36me	3.87e-56
H3	H31	P68433	15335.3	33	K9me2K36me3	1.46e-41
H3	H31	P68433	15347.5	34	K27acK36ac	1.01e-60
H3	H32	P84228	15304.4	21	K23meK27me3	6.52e-39
H3	H32	P84228	15331.4	21	K27acK36ac	1.46e-38
H3	H32	P84228	15332.5	21	K9me2K27me2K36me2	5.63e-35
H3	H32	P84228	15374.4	22	K23acK27me3K36ac	3.91e-43
H3	H32	P84228	15359.5	22	K18acK27me2K36ac	4.64e-42
H3	H32	P84228	15359.6	22	K18acK23meK27me2K36me2	9.86e-41
H3	H32	P84228	15345.5	22	K9me2K27me2K36ac	5.24e-37
H3	H32	P84228	15345.4	23	K18acK27acK36me	4.14e-46
H3	H32	P84228	15359.4	23	K18acK27acK36me2	4.14e-46
H3	H32	P84228	15331.4	23	K9me2K27acK36me	2.13e-43
H3	H32	P84228	15289.4	23	K9me2K27me	3.49e-39
H3	H32	P84228	15346.5	24	K9me2K27acK36me2	1.36e-42
H3	H32	P84228	15317.5	25	K9me2K27ac	1.12e-47
H3	H32	P84228	15305.4	26	K27me3K36me	4.51e-49
H3	H32	P84228	15317.4	26	K9me2K36ac	1.61e-48
H3	H32	P84228	15387.3	26	K18acK23acK27meK36ac	2.67e-48
H3	H32	P84228	15374.4	26	K18acK27me3K36ac	1.02e-41
H3	H32	P84228	15302.5	27	K27acK36me	3.8e-53
H3	H32	P84228	15303.3	27	K9me2K18meK27me	5.77e-53
H3	H32	P84228	15345.5	27	K9me2K27me2K36ac	1.8e-51
H3	H32	P84228	15372.5	27	K18acK27acK36ac	2.08e-51
H3	H32	P84228	15345.4	27	K18acK27acK36me	1.37e-43
H3	H32	P84228	15304.4	28	K9me2K27me2	1.19e-55
H3	H32	P84228	15331.5	28	K9me2K23meK27meK36me2	1.66e-53
H3	H32	P84228	15346.5	28	K23meK27me3K36ac	1.68e-51
H3	H32	P84228	15387.3	28	K18acK23meK27acK36ac	3.56e-50
H3	H32	P84228	15332.4	29	K27me3K36ac	9.38e-57
H3	H32	P84228	15359.4	29	K9me2K27acK36ac	4.76e-56
H3	H32	P84228	15318.4	29	K9me2K27me2K36me	6.53e-56
H3	H32	P84228	15304.4	29	K9me2K23meK27me	1.63e-55
H3	H32	P84228	15305.4	29	K23meK27me3	3.91e-54
H3	H32	P84228	15345.5	29	K18acK27me2K36me2	6.11e-54
H3	H32	P84228	15317.3	30	K23acK27meK36me	9.11e-68
H3	H32	P84228	15274.5	30	K27me2	5.17e-57
H3	H32	P84228	15318.5	30	K23meK27me3K36me	8.06e-56
H3	H32	P84228	15318.4	30	K9me2K23meK27meK36me	1.81e-50
H3	H32	P84228	15359.4	30	K18acK23acK27meK36me	1.05e-49
H3	H32	P84228	15318.4	31	K23meK27me3K36me	2.11e-60
H3	H32	P84228	15318.4	31	K27me3K36me2	3.57e-57
H3	H32	P84228	15302.5	31	K23acK27me	7.7e-48
H3	H32	P84228	15317.2	31	K9me2K27me2K36me	5.09e-45
H3	H32	P84228	15331.4	32	K23meK27me2K36ac	5.21e-62
H3	H32	P84228	15317.4	32	K27me2K36ac	8.48e-61
H3	H32	P84228	15303.4	32	K9meK18meK23meK27me	3.63e-60
H3	H32	P84228	15331.4	32	K27acK36ac	2.36e-59
H3	H32	P84228	15346.4	32	K18acK23meK27me3	4.8e-58
H3	H32	P84228	15360.5	32	K18acK27me3K36me2	6.56e-58
H3	H32	P84228	15304.4	32	K27acK36me	1.45e-57
H3	H32	P84228	15332.4	36	K9me2K27me2K36me2	7.91e-66
H3	H32	P84228	15303.4	36	K9me2K27me2	1.37e-65
H3	H32	P84228	15318.3	36	K9me2K27meK36me2	7.5e-43
H3	H32	P84228	15305.4	37	K27me3K36me	7.76e-67
H3	H33	P84244	15368.6	11	T3pK9me3K27me3K36me	1.57e-20
H3	H33	P84244	15330.4	12	K9me2K18meK23meK27me3K36me3	2.68e-29
H3	H33	P84244	15316.3	13	K9me2K23meK27me3K36me3	1.15e-32
H3	H33	P84244	15344.5	20	K9me2K23acK27me3K36me3	1.16e-38
H3	H33	P84244	15316.4	21	K23acK27me3K36me3	7.56e-42
H3	H33	P84244	15358.3	23	K18acK23acK27me3K36me3	2.02e-42
H3	H33	P84244	15355.3	23	K18acK23acK27acK36ac	6.96e-40
H3	H33	P84244	15341.4	24	K9me2K23acK27acK36ac	1.38e-41
H3	H33	P84244	15358.3	24	K9me3K23acK27acK36me3	3.36e-39
H3	H33	P84244	15386.5	25	K9me2K18acK23acK27me3K36me3	1.43e-45
H3	H33	P84244	15358.4	26	K18acK23acK27me3K36me3	3.03e-58
H3	H33	P84244	15270.6	26	K27acK36ac	4.29e-55
H3	H33	P84244	15316.5	26	K23acK27me3K36me3	6.04e-55
H3	H33	P84244	15288.5	26	K23meK27me3K36me3	3.18e-50
H3	H33	P84244	15302.4	26	K18meK23meK27me3K36me3	7.91e-49
H3	H33	P84244	15316.4	27	K9me2K23meK27me3K36me3	3.07e-59
H3	H33	P84244	15288.3	27	K23meK27me3K36me3	3.55e-57
H3	H33	P84244	15316.3	27	K9meK18meK23meK27me3K36me3	2.31e-50
H3	H33	P84244	15330.4	27	K18acK23meK27me3K36me3	3.68e-50
H3	H33	P84244	15344.5	27	K9me2K23acK27me3K36me3	4.95e-49
H3	H33	P84244	15302.4	28	K9me2K27me3K36me3	4.22e-53
H3	H33	P84244	15355.3	28	K9me2K18meK23acK27acK36ac	7.35e-52
H3	H33	P84244	15288.3	28	K9me3K27meK36me3	2.48e-51
H3	H33	P84244	15287.2	30	K23acK27meK36me3	1.92e-55
H3	H33	P84244	15302.3	31	K9me2K27me3K36me3	8.72e-56
H4	H4	P62806	11324.3	6	S1pR3me	7.04e-08
H4	H4	P62806	12009.4	6	M1acS2acR4me2K6acK9acK13acK17acK21me3S48pY52pY89p	3.53e-07
H4	H4	P62806	11981.4	6	M1acS2acK6acK9acK13acK17acK21me3S48pY52pY89p	1.72e-06
H4	H4	P62806	11360.2	8	none	3.28e-06
H4	H4	P62806	11397.2	9	S1acK8acK12acK16ac	6.6e-11
H4	H4	P62806	11272.2	10	K20me3	5.71e-21
H4	H4	P62806	11301.3	10	R3me2K20me3	1.31e-12
H4	H4	P62806	11328.4	10	R3me2K16acK20me2	3.66e-05
H4	H4	P62806	11439.2	11	S1acK5acK8acK12acK16ac	4.83e-12
H4	H4	P62806	11367.2	11	S1pR3meK20me3	2.28e-11
H4	H4	P62806	11439.3	11	S1acK5acK8acK12acK16ac	4.42e-10
H4	H4	P62806	11411.2	12	S1acK8acK12acK16acK20me	1.67e-14
H4	H4	P62806	11367.4	12	S1pR3meK20me3	1.51e-13
H4	H4	P62806	11398.2	13	S1acK16ac	1.77e-25
H4	H4	P62806	11440.3	13	S1acK8acK12acK16acK20me3	1.35e-17
H4	H4	P62806	11398.3	13	S1acK8acK16acK20me3	4.71e-16
H4	H4	P62806	11398.1	14	S1acK16ac	2.03e-18
H4	H4	P62806	11314.3	15	K16acK20me3	2.32e-33
H4	H4	P62806	11356.3	15	S1ac	3.32e-32
H4	H4	P62806	11301.2	15	R3me2K20me3	2.21e-20
H4	H4	P62806	11300.3	16	K16acK20me2	2.3e-36
H4	H4	P62806	11360.4	16	none	1.81e-22
H4	H4	P62806	11455.3	16	S1acK12acK16acK20me	5.24e-16
H4	H4	P62806	11413.1	17	S1acK16acK20me	3.65e-26
H4	H4	P62806	11413.1	17	S1acK16acK20me	3.72e-26
H4	H4	P62806	11369.1	17	S1acK12acK16acK20me	2.27e-25
H4	H4	P62806	11441.4	17	S1acK16acK20me3	1.31e-23
H4	H4	P62806	11368.4	17	S1acK8acK16acK20me	5.08e-22
H4	H4	P62806	11455.2	17	S1acK12acK16acK20me	6.29e-20
H4	H4	P62806	11400.2	18	S1acK20me3	2.07e-27
H4	H4	P62806	11440.3	18	S1acK12acK16ac	4.47e-22
H4	H4	P62806	11285.2	19	S1acK20me	1.82e-20
H4	H4	P62806	11399.2	20	S1acK20me3	1.9e-36
H4	H4	P62806	11441.3	20	S1acK16acK20me3	6.65e-26
H4	H4	P62806	11370.1	20	S1acK20me	9.55e-26
H4	H4	P62806	11355.3	22	S1acK12acK16ac	1.83e-32
H4	H4	P62806	11425.4	23	S1acK8acK12acK16acK20me2	1.5e-47
H4	H4	P62806	11257.2	24	K20me2	2.88e-44
H4	H4	P62806	11399.2	24	S1acK12acK16acK20me3	2.15e-28
H4	H4	P62806	11285.4	25	S1acK20me	5.58e-44
H4	H4	P62806	11313.3	25	S1acK16ac	7.76e-31
H4	H4	P62806	11399.2	25	S1acK8acK16acK20me3	1.32e-23
H4	H4	P62806	11327.3	26	S1acK16acK20me	6.58e-43
H4	H4	P62806	11399.2	26	S1acK12acK16acK20me3	7.42e-25
H4	H4	P62806	11314.3	27	S1acK20me3	1.87e-52
H4	H4	P62806	11327.3	27	S1acK16acK20me	3.43e-42
H4	H4	P62806	11313.4	27	S1acK16ac	1.32e-34
H4	H4	P62806	11355.3	29	S1acK12acK16ac	7.98e-28
H4	H4	P62806	11314.3	31	S1acK20me3	1.96e-49
H4	H4	P62806	11383.3	31	S1acK8acK16acK20me2	2.2e-44
H4	H4	P62806	11356.3	34	S1acK16acK20me3	9.54e-56
H4	H4	P62806	11357.2	34	S1acK16acK20me3	1.36e-49
H4	H4	P62806	11383.4	34	S1acK12acK16acK20me2	9.49e-45
H4	H4	P62806	11397.4	34	S1acK8acK12acK16ac	7.33e-40
H4	H4	P62806	11300.2	45	S1acK20me2	1.33e-71
H4	H4	P62806	11383.3	49	S1acK8acK16acK20me2	4.92e-56
H4	H4	P62806	11341.4	51	S1acK16acK20me2	1.71e-83
H4	H4	P62806	11341.3	58	S1acK16acK20me2	1.69e-80
H4	H4	P62806	11299.3	61	S1acK20me2	3.08e-82
H4	H4	P62806	11383.4	68	S1acK12acK16acK20me2	9.21e-93
