# Supplementary material for: Mapping Influenza-Induced Posttranslational Modifications on Histones from CD8+ T Cells
Source: Preprints.org preprint supplement (doi:10.20944/preprints202010.0215.v1), 2020-10-12
Supplement: Supplementary file 3 [file Rezinciuc_Supplementary File 2_final.xlsx]

## Sheet: BAL
Core	Subtype	Accession Number	Observed Mass (Da)	Matching Fragments (#)	PTMs	P value	Normalized Intensity (%)
H2A	H2A1	P22752	13996	16	none	4.1e-13	2.806
H2A	H2A1	P22752	14022.9	18	R3me2	4.1e-20	1.061
H2A	H2A1	P22752	14037	47	S1ac	8.1e-65	0.676
H2A	H2A1H	Q8CGP6	13839	14	R3me2	4e-18	0.551
H2A	H2A2A	Q6GSS7	13998	56	S1ac	1.6e-74	3.164
H2A	H2A2A	Q6GSS7	14040	9	S1acK5ac	4.7e-07	0.364
H2A	H2A2A	Q6GSS7	14036.1	15	S1p	1.1e-12	0.637
H2A	H2A2B	Q64522	13996	33	S1acT120p	2.9e-38	2.806
H2A	H2A3	Q8BFU2	14023	22	S1ac	4e-34	1.061
H2A	H2A3	Q8BFU2	14009	21	R3me2	9.6e-25	0.676
H2A	H2AC20	Q149V4	13890	44	S1ac	4.2e-86	0.219
H2A	H2AZ	P0C0S6	13414.7	15	none	4.7e-27	0.217
H2A	H2AZ	P0C0S6	13412.7	41	none	4.2e-85	0.285
H2B	H2B1C	Q6ZWY9	13765.6	45	none	1.4e-66	1.359
H2B	H2B1C	Q6ZWY9	13808.7	28	K23ac	4.9e-28	2.56
H2B	H2B1F	P10853	13795.6	43	none	7.4e-63	1.359
H2B	H2B1H	Q64478	13780.5	27	none	1.4e-31	1.865
H2B	H2B1K	Q8CGP1	13781.5	13	none	5.5e-27	0.227
H2B	H2B1M	P10854	13795.6	20	none	5.3e-21	2.669
H2B	H2B2B	Q64525	13780.5	10	none	7.3e-12	1.794
H2B	H2B3B	Q8CGP0	13768.5	9	none	1.9e-12	2.327
H3	H31	P68433	15360.7	23	K9me2K27me2K36ac	2.9e-37	0.91
H3	H31	P68433	15346.7	23	K9me2K27me2K36me2	4.5e-37	0.91
H3	H31	P68433	15290.7	13	K9me2	8.9e-27	0.238
H3	H31	P68433	15349.7	7	K27me3K36me3	1e-17	0.123
H3	H32	P84228	15304.6	8	K4meK9me3	3.3e-08	0.042
H3	H32	P84228	15331.6	22	K9me2K27me2K36me2	2.4e-36	0.042
H3	H32	P84228	15317.5	23	K9me2K27me2K36me	5.2e-38	0.042
H3	H32	P84228	15346.6	6	A1acK4meK9me3	6.4e-07	0.185
H3	H32	P84228	15302.6	21	K9me2K27me2	1.1e-33	0.91
H3	H32	P84228	15302.6	30	K9me2K36me2	2.7e-40	0.269
H3	H33	P84244	15317.5	8	K9me3K27me3K36me3	2.9e-08	0.325
H3	H33	P84244	15331.6	7	K4meK9me3K27me3K36me3	6.1e-07	0.042
H3	H33	P84244	15329.6	18	K9me2K18meK23meK27me3K36me3	1e-35	0.325
H3	H33	P84244	15346.7	12	K37me2	5.9e-13	0.238
H3	H33	P84244	15331.5	12	K37me	5.9e-13	0.238
H3	H33	P84244	15287.7	7	K9meK27me3K36me3	1.6e-18	0.268
H3	H33	P84244	15344.5	26	K9me2K23acK27me3K36me3	1.2e-34	0.269
H4	H4	P62806	11314.6	17	S1acK20me3	3.3e-32	0.537
H4	H4	P62806	11356.5	12	S1acK16acK20me3	4.7e-27	0.442
H4	H4	P62806	11314.5	6	K12acK20me3	1.7e-08	1.435
H4	H4	P62806	11312.5	13	S1acK16ac	1.6e-16	0.989
H4	H4	P62806	11298.6	65	S1acK20me2	6.9e-91	15.638
H4	H4	P62806	11284.6	34	S1acK20me	2.8e-41	15.638
H4	H4	P62806	11300.4	31	R3me2K20me3	8.6e-36	7.376
H4	H4	P62806	11352.4	14	S1pK20me3	1.3e-13	8.839
H4	H4	P62806	11340.6	56	S1acK16acK20me2	8.3e-75	6.805
H4	H4	P62806	11326.5	25	S1acK16acK20me	4.9e-27	6.805
H4	H4	P62806	11399.4	17	S1acK12acK16acK20me3	1.8e-29	0.898
H4	H4	P62806	11383.5	40	S1acK12acK16acK20me2	7.5e-65	0.534

## Sheet: Lung
Core	Subtype	Accession Number	Observed Mass (Da)	Matching Fragments (#)	PTMs	P value	Normalized Intensity (%)
H1	H1C	Q5SZA3	21163.8	17	S1ac	2.1e-34	0.266
H2A	H2A1	P22752	14037.1	32	K5ac	9e-33	12.64
H2A	H2A1	P22752	14037.9	52	S1ac	5.6e-89	1.547
H2A	H2A1	P22752	14023	16	R3me2	6.4e-15	2.118
H2A	H2A1	P22752	14079.1	9	S1acK5ac	8.5e-13	0.9
H2A	H2A1	P22752	14041.2	10	none	1.3e-15	3.045
H2A	H2A1F	Q8CGP5	14021.2	6	none	0.0018	7.097
H2A	H2A1F	Q8CGP5	14063.9	13	S1ac	3.4e-29	2.35
H2A	H2A1K	Q8CGP7	14052.9	31	K5ac	2.6e-29	12.579
H2A	H2A2A	Q6GSS7	14040.1	7	S1acK5ac	4.5e-05	2.267
H2A	H2A2A	Q6GSS7	13997.1	56	S1ac	4.5e-82	3.918
H2A	H2A2A	Q6GSS7	14078.1	6	S1pK5ac	6.1e-06	0.955
H2A	H2A2A	Q6GSS7	14078.1	8	S1acT120p	2.5e-13	0.955
H2A	H2A3	Q8BFU2	14023	25	S1ac	1.3e-36	2.118
H2A	H2A3	Q8BFU2	14062.2	25	S1p	5.3e-34	1.473
H2A	H2AC12	A3KPD0	13852.9	15	S1ac	8.3e-34	0.918
H2A	H2AC15	Q0VE75	14051	30	S1ac	4.6e-57	1.099
H2A	H2AC20	Q149V4	13889.9	38	S1ac	3.9e-74	1.128
H2A	H2AX	P27661	15044.5	29	S1ac	1.3e-56	1.237
H2A	H2AZ	P0C0S6	13413.7	18	none	1.6e-40	0.677
H2B	H2B1B	Q64475	13812.6	30	none	6.8e-39	1.7
H2B	H2B1B	Q64475	13853.6	12	P1ac	1.2e-11	1.318
H2B	H2B1C	Q6ZWY9	13845.6	11	S14p	4.5e-23	2.567
H2B	H2B1C	Q6ZWY9	13808.6	22	K108ac	1.2e-39	1.811
H2B	H2B1C	Q6ZWY9	13765.6	49	none	1.2e-65	0.93
H2B	H2B1F	P10853	13795.7	42	none	2.3e-59	2.161
H2B	H2B1H	Q64478	13780.6	27	none	2.1e-23	2.416
H2B	H2B1K	Q8CGP1	13779.6	20	none	3.2e-35	1.811
H2B	H2B1M	P10854	13795.6	19	none	2.6e-22	3.196
H2B	H2B2B	Q64525	13779.6	17	none	1.6e-20	1.811
H3	H33	P84244	15386.5	8	K9me2K18acK23acK27me3K36me3	7.9e-20	0.438
H4	H4	P62806	11314.6	17	S1acK20me3	1.2e-23	2.378
H4	H4	P62806	11357.4	18	S1acK16acK20me3	1.4e-24	2.773
H4	H4	P62806	11341.5	29	S1acK16acK20me2	1.7e-32	2.963
H4	H4	P62806	11299.6	54	S1acK20me2	2.6e-73	2.385
H4	H4	P62806	11284.4	40	S1acK20me	3e-51	2.385
H4	H4	P62806	11300.4	26	R3me2K20me3	8.6e-36	1.741
H4	H4	P62806	11285.4	25	R3me2K20me2	8.4e-34	1.741
H4	H4	P62806	11287.4	10	R3meK20me3	3.7e-15	2.093
H4	H4	P62806	11327.4	6	S1acK16acK20me	2.1e-14	2.093

## Sheet: Spleen
Core	Subtype	Accession Number	Observed Mass (Da)	Matching Fragments (#)	PTMs	P value	Normalized Intensity (%)
H1	H1F2	Q5SZA3	21164.9	21	S1ac	8.8e-36	0.369
H2A	H2A1	P22752	13995	16	none	1e-11	2.305
H2A	H2A1	P22752	14080.1	25	S1acK5ac	2.6e-36	0.767
H2A	H2A1	P22752	14118.1	9	S1pK5ac	5.9e-09	0.532
H2A	H2A1	P22752	14118.1	9	S1acT120p	2.8e-19	0.532
H2A	H2A1	P22752	14038.1	45	S1ac	2.5e-84	0.239
H2A	H2A1F	Q8CGP5	14050.1	10	R3me2	1.9e-08	0.767
H2A	H2A1F	Q8CGP5	14063	32	S1ac	4.2e-45	1.44
H2A	H2A2A	Q6GSS7	13997.1	52	S1ac	5.6e-79	3.138
H2A	H2A2A	Q6GSS7	14064	10	S1pR3me2	5.2e-15	9.434
H2A	H2A2A	Q6GSS7	14034.9	10	S1p	4.6e-06	9.493
H2A	H2A2A	Q6GSS7	14039.1	8	S1acK5ac	6.1e-07	1.831
H2A	H2A2A	Q6GSS7	14118.9	11	S1acK5acT120p	3.9e-14	0.767
H2A	H2A2A	Q6GSS7	14077.9	9	S1pK5ac	1.8e-05	0.48
H2A	H2A2A	Q6GSS7	14077.9	12	S1acT120p	1.9e-11	0.48
H2A	H2A2B	Q64522	13994.9	31	S1acT120p	3.1e-37	2.305
H2A	H2A3	Q8BFU2	14023	18	S1ac	1e-16	15.384
H2A	H2A3	Q8BFU2	14061	21	S1p	2.8e-24	1.358
H2A	H2A3	Q8BFU2	14065.1	18	S1acK5ac	6.8e-25	0.767
H2A	H2AC12	A3KPD0	13852	52	S1ac	5.4e-81	0.444
H2A	H2AC15	Q0VE75	14051	37	S1ac	4e-52	1.592
H2A	H2AC20	Q149V4	13890.8	45	S1ac	1.6e-63	0.624
H2A	H2AJ	Q8R1M2	13947	36	S1ac	2.1e-72	0.138
H2A	H2AX	P27661	15044.5	54	S1ac	2.5e-76	0.378
H2A	H2AZ	P0C0S6	13412.5	49	none	5.6e-89	0.177
H2B	H2B1A	P70696	14564.7	18	M1acK7acK13acK14acK17acK18acK22acK25ac	1.2e-16	0.964
H2B	H2B1B	Q64475	13811.6	37	none	2.2e-48	0.121
H2B	H2B1C	Q6ZWY9	13845.6	24	S14p	6.5e-46	0.156
H2B	H2B1C	Q6ZWY9	13808.6	17	P1ac	1.7e-14	3.111
H2B	H2B1C	Q6ZWY9	13765.6	53	none	2.8e-68	1.672
H2B	H2B1F	P10853	13795.7	51	none	5.8e-93	0.123
H2B	H2B1F	P10853	13838.7	21	K23ac	6.4e-44	0.378
H2B	H2B1H	Q64478	13808.6	23	none	5.7e-20	3.111
H2B	H2B1H	Q64478	13779.6	40	none	3.1e-46	1.672
H2B	H2B1K	Q8CGP1	13779.6	28	none	2.1e-32	2.044
H2B	H2B1M	P10854	13795.6	22	none	1.7e-21	1.004
H2B	H2B2B	Q64525	13779.6	22	none	3.9e-24	1.672
H3	H31	P68433	15393.5	18	K9me3K27me3K36me3	1.2e-20	0.15
H3	H31	P68433	15349.6	11	K27me3K36me3	4.2e-29	0.378
H3	H31	P68433	15377.6	13	K18meK23meK27me3K36me3	2.4e-26	0.425
H3	H31	P68433	15407.6	13	K9me3K23meK27me3K36me3	6.9e-28	0.15
H3	H31	P68433	15347.6	20	K18acK27me2K36me	3.9e-43	0.15
H3	H31	P68433	15430.6	15	K9me2K18meK23acK27acK36ac	2.5e-21	0.407
H3	H32	P84228	15414.6	14	K9me2K18meK23acK27acK36ac	2.3e-28	0.082
H3	H32	P84228	15414.6	14	K18acK23acK27acK36ac	2.1e-29	0.293
H3	H32	P84228	15442.7	8	K9me2K18acK23acK27acK36ac	2.5e-17	0.172
H3	H33	P84244	15386.4	13	K9me2K18acK23acK27me3K36me3	2.4e-18	0.407
H4	H4	P62806	11314.5	12	K5acK20me3	2.7e-10	3.045
H4	H4	P62806	11356.5	17	S1ac	3.5e-15	2.962
H4	H4	P62806	11314.4	19	S1acK20me3	1.6e-18	2.969
H4	H4	P62806	11300.6	19	R3me2K20me3	9.9e-19	2.969
H4	H4	P62806	11342.3	25	R3me2K12acK20me3	8.8e-27	1.689
H4	H4	P62806	11343.4	21	R3me2K16acK20me3	1.7e-21	2.204
H4	H4	P62806	11340.5	11	S1acK16acK20me2	4.7e-15	1.188
H4	H4	P62806	11356.4	18	S1acK16acK20me3	9.1e-21	0.929
H4	H4	P62806	11399.6	13	S1acK20me3	6.3e-14	0.929
H4	H4	P62806	11383.5	13	S1acK12acK16acK20me2	1e-21	0.163
H4	H4	P62806	11284.5	31	S1acK20me	1.3e-37	2.311
H4	H4	P62806	11286.5	28	R3meK20me3	9.5e-37	2.129
H4	H4	P62806	11299.4	52	S1acK20me2	8.4e-74	2.129
